# Supplementary material
Source: PubMed Central journal article supplement (PMC2596267)
Supplement: 0805571105_0805571105SI.pdf [file 0805571105_0805571105SI.pdf]

# Supporting Information

Rozenfeld et al. 10.1073/pnas.08055711105

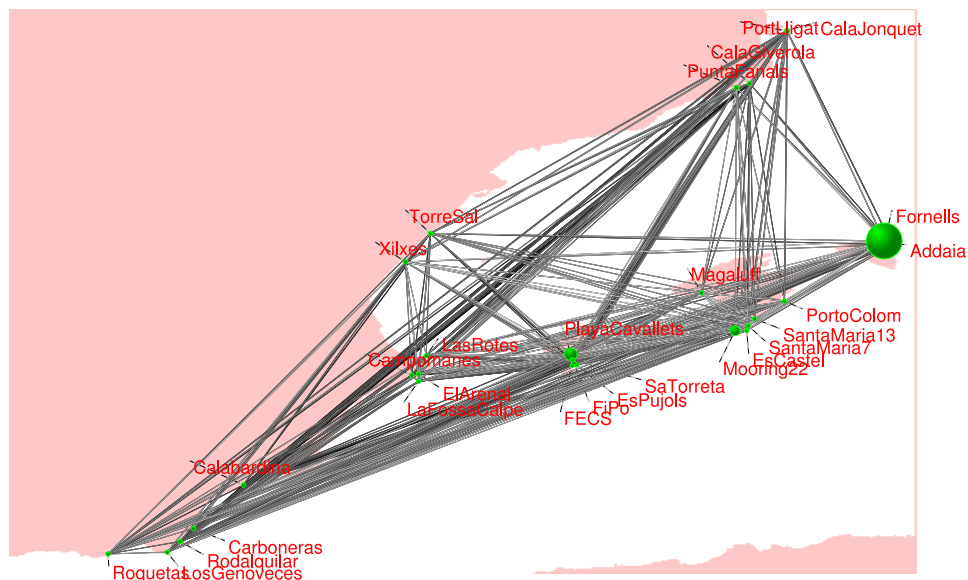

Movie S1. Sequence of networks for the Spanish populations obtained at successive values of the threshold genetic distance,  $thr$ , above which links are discarded.

[Movie S1 \(AVI\)](#)

**Table S1. Local properties of the whole Mediterranean network for  $thr = Dp = 91$**

| Region                   | Name            | <i>R</i>        | <i>bc</i>   | <i>C</i> | Region       | Name                                                    | <i>R</i>      | <i>bc</i>    | <i>C</i> |        |
|--------------------------|-----------------|-----------------|-------------|----------|--------------|---------------------------------------------------------|---------------|--------------|----------|--------|
| Spanish Balearic Islands | Menorca         | Addaia          | 0.67        | 0.0010   | 0.980        | Spanish Iberian Peninsula (Ordered from north to south) | Cala Jonquet  | 0.5          | 0.0031   | 0.946  |
|                          |                 | Fornells        | 0.1         | 0.0031   | 0.946        |                                                         | Port Lligat   | 0.28         | 0.0031   | 0.946  |
|                          | Mallorca        | Magaluf         | 0.68        | 0.0010   | 0.981        |                                                         | Cala Giverola | 0.43         | 0        | 0.997  |
|                          |                 | Porto Colom     | 0.5         | 0.0031   | 0.946        |                                                         | Punta Fanals  | 0.68         | 0.0010   | 0.981  |
|                          |                 | Es Castel       | 0.1         | 0.0010   | 0.981        |                                                         | Torre Sal     | 0.5          | 0.0010   | 0.981  |
|                          | Cabrera         | Es Port         | 0.1         | 0.0031   | 0.946        |                                                         | Xilxes        | 0.35         | 0.0010   | 0.981  |
|                          |                 | Santa Maria 13  | 0.56        | 0.0010   | 0.981        |                                                         | Las Rotes     | 0.73         | 0.0010   | 0.981  |
|                          |                 | Santa Maria 7   | 0.54        | 0.0010   | 0.981        |                                                         | El Arenal     | 0.86         | 0.0031   | 0.946  |
|                          | Ibiza           | Playa Cavallets | 0.73        | 0.0031   | 0.946        |                                                         | Campomanes    | 0.7          | 0.0031   | 0.946  |
|                          |                 | Formentera      | Es Pujols   | 0.67     | 0.0031       |                                                         | 0.946         | LaFossaCalpe | 0.77     | 0.0031 |
|                          | EsCalo de S'Oli |                 | 0.36        | 0.0010   | 0.981        |                                                         | Calabardina   | 0.88         | 0.0003   | 0.997  |
|                          | Ses Illetes     |                 | 0.6         | 0.0031   | 0.946        |                                                         | Carboneras    | 0.32         | 0.0010   | 0.981  |
|                          | Sa Torreta      |                 | 0.51        | 0.0031   | 0.946        |                                                         | Rodalquilar   | 0.53         | 0.0010   | 0.981  |
|                          | Tunis           |                 | 0.85        | 0        | 1            |                                                         | Los Genoveces | 0.34         | 0.0010   | 0.981  |
|                          | Central Basin   | Malta           | 0.74        | 0        | 1            |                                                         | East Basin    | Cyprus       | Roquetas | 0.69   |
| A. AzzuraST3             |                 |                 | 0.77        | 0.205    | 0.897        | Amathous ST3                                            | 0.44          |              | 0        | 1      |
| A. AzzuraST5             |                 | 0.72            | 0.0017      | 0.963    | Amathous ST5 | 0.62                                                    | 0.0008        |              | 0.667    |        |
| Marzamemi                |                 | 0.81            | 0.0003      | 0.995    | Paphos       | 0.68                                                    | 0.1579        |              | 0.333    |        |
| Sicily                   |                 | Greece          | A. Nicolaos | 0.69     | 0            | 1                                                       |               |              |          |        |

Information is given for the betweenness centrality (*bc*) and clustering (*C*), as well as clonal diversity estimates (*R*) for each sample.
